# Supplementary material for: Fission yeast Stn1 is crucial for semi-conservative replication at telomeres and subtelomeres
Source: PubMed Central journal article supplement — Nucleic Acids Res. 2016 Nov 29;45(3):1255–69. doi: 10.1093/nar/gkw1176 (PMC5388396; doi:10.1093/nar/gkw1176), 2016-11-29
Supplement: gkw1176_Supp.pdf [file gkw1176_Supp.pdf]

# **Fission Yeast Stn1 Is Crucial for Semi-conservative Replication at Telomeres and Subtelomeres**

## **Supplementary Information**

Masahiro Takikawa<sup>1</sup>, Yusuke Tarumoto<sup>1, #</sup>, and Fuyuki Ishikawa<sup>1, \*</sup>

<sup>1</sup> Department of Gene Mechanisms, Graduate School of Biostudies, Kyoto University,  
Yoshida-Konoe-cho, Sakyo-ku, Kyoto 606-8501, Japan

<sup>#</sup> Current address: Cold Spring Harbor Laboratory, Cold Spring Harbor, New York,  
United States of America

<sup>\*</sup> Corresponding author

E-mail: [fishikaw@lif.kyoto-u.ac.jp](mailto:fishikaw@lif.kyoto-u.ac.jp) (FI)

**Table S1.**

Strains used in this study. Original sources in the table are (1) and (2). We adapted the gene disruption protocol reported in (3) and used primers are shown below.

*rifI* disruption primers

w: 5'-ggtgataagttaataaagggtg-3'

x: 5'-GGGGATCCGTCGACCTGCAGCGTACGAtcgcaacatcagctggtatg-3'

y: 5'-GTTTAAACGAGCTCGAATTCATCGATctaattgtagtcggacaattg-3'

z: 5'-tcttcaatggatgacagaatac-3'

*stnI* disruption primers

w: 5'-aagaatgcattttccacgag-3'

x: 5'-GGGGATCCGTCGACCTGCAGCGTACGAataattgaattgagagaagatc-3'

y: 5'-GTTTAAACGAGCTCGAATTCATCGATcattgttctatatgcaatattac-3'

z: 5'-gacatagttttatcctcatgac-3'

*exoI* disruption primers

w: 5'-cctcatacagctaaattcaatg-3'

x: 5'-GGGGATCCGTCGACCTGCAGCGTACGAcattcgtcaagcaccaaaag-3'

y: 5'-GTTTAAACGAGCTCGAATTCATCGATcacctttctcattatcacc-3'

z: 5'-agaaatgattcaactaatcctg-3'

*mreI1* disruption primers

w: 5'-ctaatttaaactttgttttagtag-3'

x: 5'-GGGGATCCGTCGACCTGCAGCGTACGAcatatctgaggggtcatttg-3'

y: 5'-GTTTAAACGAGCTCGAATTCATCGATaatgtcttctgaagatagtc-3'

z: 5'-tggtactttttcacttcttg-3'

*sds2I* disruption primers

w: 5'-cttgccctatttggtgctg-3'

x: 5'-GGGGATCCGTCGACCTGCAGCGTACGAataatcgcatcaatatcataac-3'

y: 5'-GTTTAAACGAGCTCGAATTCATCGATgctaaatgagaactattataaag-3'

z: 5'-ccataacatagtaaataatgcatc-3'

*dis2* disruption primers

w: 5'-aaaattgaatcaatttgctagac-3'

x: 5'-GGGGATCCGTCGACCTGCAGCGTACGAggaatccaaatccacatctg-3'

y: 5'-GTTTAAACGAGCTCGAATTCATCGATgtcatttctcaatggtcgatg-3'

z: 5'-caaggaatgccgaaacattg-3'

### Supplementary References

1. Miyoshi, T., Sadaie, M., Kanoh, J. and Ishikawa, F. (2003) Telomeric DNA ends are essential for the localization of Ku at telomeres in fission yeast. *J Biol Chem*, **278**, 1924-1931.
2. Kanoh, J. and Ishikawa, F. (2001) spRap1 and spRif1, recruited to telomeres by Taz1, are essential for telomere function in fission yeast. *Curr Biol*, **11**, 1624-1630.
3. Krawchuk, M.D. and Wahls, W.P. (1999) High-efficiency gene targeting in *Schizosaccharomyces pombe* using a modular, PCR-based approach with long tracts of flanking homology. *Yeast*, **15**, 1419-1427.

*S. pombe* strains used in this study

|          | Strain | Genotype                                                                                                                           | Original source of strain           | Construction method                                                                                                                 |
|----------|--------|------------------------------------------------------------------------------------------------------------------------------------|-------------------------------------|-------------------------------------------------------------------------------------------------------------------------------------|
| Fig. 1B  | JK317  | <i>h<sup>+</sup> leu1-32 ura4-D18</i>                                                                                              | (1) in the Supplementary manuscript |                                                                                                                                     |
|          | MT4526 | <i>h<sup>+</sup> leu1-32 ura4-D18 stn1-3flag::ura4<sup>+</sup></i>                                                                 | This study                          | JK317 was transformed with pMT842 ( <i>Ustn1-stn1-3flag-Tnmt1-ura4<sup>+</sup>-Dstn1</i> based on pUC119) DNA fragment.             |
|          | MT3982 | <i>h<sup>+</sup> leu1-32 ura4-D18 stn1-1-3flag::ura4<sup>+</sup></i>                                                               | This study                          | JK317 was transformed with pMT843 ( <i>Ustn1-stn1-1-3flag-Tnmt1-ura4<sup>+</sup>-Dstn1</i> based on pUC119) DNA fragment.           |
| Fig. 1C  | MT3967 | <i>h<sup>+</sup> leu1-32 ura4-D18 stn1-3flag::LEU2</i>                                                                             | This study                          | JK317 was transformed with pMT844 ( <i>Ustn1-stn1-3flag-Tnmt1-LEU2-Dstn1</i> based on pUC119) DNA fragment.                         |
|          | MT3982 | Fig. 1B                                                                                                                            |                                     |                                                                                                                                     |
| Fig. 1D  | JK317  | Fig. 1B                                                                                                                            |                                     |                                                                                                                                     |
|          | MT4526 | Fig. 1B                                                                                                                            |                                     |                                                                                                                                     |
|          | MT3982 | Fig. 1B                                                                                                                            |                                     |                                                                                                                                     |
| Fig. 1E  | JK317  | Fig. 1B                                                                                                                            |                                     |                                                                                                                                     |
|          | JK702  | <i>h<sup>+</sup> leu1-32 ura4-D18 taz1::ura4<sup>+</sup></i>                                                                       | (2) in the Supplementary manuscript |                                                                                                                                     |
|          | MT3982 | Fig. 1B                                                                                                                            |                                     |                                                                                                                                     |
| Fig. 1F  | JK317  | Fig. 1B                                                                                                                            |                                     |                                                                                                                                     |
|          | MT3982 | Fig. 1B                                                                                                                            |                                     |                                                                                                                                     |
| Fig. 2B  | MT3967 | Fig. 1C                                                                                                                            |                                     |                                                                                                                                     |
|          | MT3982 | Fig. 1B                                                                                                                            |                                     |                                                                                                                                     |
| Fig. 2C  | MT3982 | Fig. 1B                                                                                                                            |                                     |                                                                                                                                     |
| Fig. 3A  | JK317  | Fig. 1B                                                                                                                            |                                     |                                                                                                                                     |
|          | MT3982 | Fig. 1B                                                                                                                            |                                     |                                                                                                                                     |
| Fig. 3C  | JK317  | Fig. 1B                                                                                                                            |                                     |                                                                                                                                     |
|          | MT3982 | Fig. 1B                                                                                                                            |                                     |                                                                                                                                     |
| Fig. 4A  | MT3967 | Fig. 1C                                                                                                                            |                                     |                                                                                                                                     |
|          | MT4510 | <i>h<sup>+</sup> leu1-32 ura4-D18 stn1-1-3flag::LEU2</i>                                                                           | This study                          | JK317 was transformed with pMT845 ( <i>Ustn1-stn1-1-3xflag-Tnmt1-LEU2-Dstn1</i> based on pUC119) DNA fragment.                      |
| Fig. 4C  | JK317  | Fig. 1B                                                                                                                            |                                     |                                                                                                                                     |
|          | MT3982 | Fig. 1B                                                                                                                            |                                     |                                                                                                                                     |
| Fig. 4D  | TM2001 | <i>h<sup>+</sup> leu1-32 ura4-D18 rad11-12myc::ura4<sup>+</sup></i>                                                                | Lab stock                           | JK317 was transformed with pMP148 ( <i>rad11-12myc-Tnmt1-ura4<sup>+</sup></i> based on pJK202) DNA fragment.                        |
|          | MT4513 | <i>h<sup>90</sup> or h<sup>+</sup> leu1-32 ura4-D18 stn1-1-3flag::LEU2 rad11-12myc::ura4<sup>+</sup></i>                           | This study                          | MT4512 was mated with TM2001. Isolation by random spore.                                                                            |
| Fig. 4E  | MT4515 | <i>h<sup>+</sup> leu1-32 ura4-D18 rad22-12myc::ura4<sup>+</sup></i>                                                                | This study                          | JK317 was transformed with pMT846 ( <i>rad52-12myc-Tnmt1-ura4<sup>+</sup></i> based on pJK202) DNA fragment.                        |
|          | MT4516 | <i>h<sup>+</sup> leu1-32 ura4-D18 stn1-1-3flag::LEU2 rad22-12myc::ura4<sup>+</sup></i>                                             | This study                          | MT4510 was transformed with pMT846 ( <i>rad52-12myc-Tnmt1-ura4<sup>+</sup></i> based on pJK202) DNA fragment.                       |
| Fig. 5A  | JK317  | Fig. 1B                                                                                                                            |                                     |                                                                                                                                     |
|          | MT3982 | Fig. 1B                                                                                                                            |                                     |                                                                                                                                     |
| Fig. 5B  | JK317  | Fig. 1B                                                                                                                            |                                     |                                                                                                                                     |
|          | MT3982 | Fig. 1B                                                                                                                            |                                     |                                                                                                                                     |
| Fig. 5C  | MT4530 | <i>h<sup>+</sup>/h<sup>-</sup> ade6-M210/ade6-M216 leu1-32/leu1-32 ura4-D18/ura4-D18 stn1<sup>+</sup>/stn1<sup>-</sup>::kanMX6</i> | This study                          | <i>stn1</i> was disrupted in YT1738                                                                                                 |
|          | MT4704 | <i>h<sup>+</sup>/h<sup>-</sup> ade6-M210/ade6-M216 leu1-32/leu1-32 ura4-D18/ura4-D18 pot1<sup>+</sup>/pot1<sup>-</sup>::kanMX6</i> | This study                          | <i>pot1</i> was disrupted in YT1738                                                                                                 |
| Fig. 5D  | MT4506 | <i>h<sup>+</sup> leu1-32 ura4-D18 chk1-3ha::kanMX6 stn1-1-3flag::ura4<sup>+</sup></i>                                              | This study                          | MT3982 was transformed with pHY840 ( <i>cds1-3ha-Tnmt1-kanMX6</i> based on pMP43) DNA fragment.                                     |
| Fig. 5E  | MT4508 | <i>h<sup>+</sup> leu1-32 ura4-D18 cds1-3ha::kanMX6 stn1-1-3flag::ura4<sup>+</sup></i>                                              | This study                          | MT3982 was transformed with pHY841 ( <i>chk1-3ha-Tnmt1-kanMX6</i> based on pMP43) DNA fragment.                                     |
| Fig. 6A  | MT4518 | <i>h<sup>+</sup> leu1-32 ura4-D18 stn1-1-3flag::ura4<sup>+</sup> [pAL-SK]</i>                                                      | This study                          | MT3982 was transformed with pAL-SK.                                                                                                 |
|          | MT4519 | <i>h<sup>+</sup> leu1-32 ura4-D18 stn1-1-3flag::ura4<sup>+</sup> [pAL-SK-stn1<sup>+</sup>]</i>                                     | This study                          | MT3982 was transformed with pMT847 (One isolated plasmid that contains <i>stn1<sup>+</sup></i> , derived from genomic DNA library). |
|          | MT4520 | <i>h<sup>+</sup> leu1-32 ura4-D18 stn1-1-3flag::ura4<sup>+</sup> [pAL-SK-pmt3<sup>+</sup>]</i>                                     | This study                          | MT3982 was transformed with pMT848 ( <i>pmt3<sup>+</sup>-LEU2</i> based on pAL-SK).                                                 |
|          | MT4522 | <i>h<sup>+</sup> leu1-32 ura4-D18 stn1-1-3flag::ura4<sup>+</sup> rif1::kanMX6 [pAL-SK]</i>                                         | This study                          | <i>rif1</i> gene was disrupted in MT4518                                                                                            |
|          | MT4524 | <i>h<sup>+</sup> leu1-32 ura4-D18 stn1-1-3flag::ura4<sup>+</sup> [pAL-SK-rif1<sup>+</sup>]</i>                                     | This study                          | MT3982 was transformed with pMT849 ( <i>rif1<sup>+</sup>-LEU2</i> based on pAL-SK).                                                 |
|          | MT4527 | <i>h<sup>+</sup> leu1-32 ura4-D18 stn1-3flag::ura4<sup>+</sup> [pAL-SK-rif1<sup>+</sup>]</i>                                       | This study                          | MT4526 was transformed with pMT849 ( <i>rif1<sup>+</sup>-LEU2</i> based on pAL-SK).                                                 |
|          | MT4481 | <i>h<sup>90</sup> or h<sup>+</sup> leu1-32 ura4-D18 stn1-1-3flag::LEU2 dis2::kanMX6</i>                                            | This study                          | MT4512 was mated with MT4463. Isolation by random spore.                                                                            |
|          | MT4479 | <i>h<sup>90</sup> or h<sup>+</sup> leu1-32 ura4-D18 stn1-1-3flag::LEU2 sds21::hphMX6</i>                                           | This study                          | MT4512 was mated with MT4461. Isolation by random spore.                                                                            |
| Fig. 6B  | MT4518 | Fig. 6A                                                                                                                            |                                     |                                                                                                                                     |
|          | MT4519 | Fig. 6A                                                                                                                            |                                     |                                                                                                                                     |
|          | MT4520 | Fig. 6A                                                                                                                            |                                     |                                                                                                                                     |
|          | MT4662 | <i>h<sup>+</sup> leu1-32 ura4-D18 stn1-1-3flag::ura4<sup>+</sup> [pAL-SK-pmt3-AA]</i>                                              | This study                          | MT3982 was transformed with pMT850 ( <i>pmt3-AA-LEU2</i> in pAL-SK)                                                                 |
|          | MT4629 | <i>h<sup>+</sup> leu1-32 ura4-D18 stn1-1-3flag::ura4<sup>+</sup> tpz1-K242R-3ha::kanMX6 [pAL-SK]</i>                               | This study                          | MT4518 was transformed with pMT851 ( <i>tpz1-K242R-3ha-Tnmt1-kanMX6</i> based on pMP43) DNA fragment.                               |
|          | MT4631 | <i>h<sup>+</sup> leu1-32 ura4-D18 stn1-1-3flag::ura4<sup>+</sup> tpz1-K242R-3ha::kanMX6 [pAL-SK-pmt3<sup>+</sup>]</i>              | This study                          | MT4520 was transformed with pMT851 ( <i>tpz1-K242R-3ha-Tnmt1-kanMX6</i> based on pMP43) DNA fragment.                               |
| Fig. 6C  | MT3982 | Fig. 1B                                                                                                                            |                                     |                                                                                                                                     |
|          | MT4520 | Fig. 6A                                                                                                                            |                                     |                                                                                                                                     |
|          | MT4522 | Fig. 6A                                                                                                                            |                                     |                                                                                                                                     |
| Fig. 6D  | MT4522 | Fig. 6A                                                                                                                            |                                     |                                                                                                                                     |
| Fig. S1A | JK317  | Fig. 1B                                                                                                                            |                                     |                                                                                                                                     |

|              |        |                                                                                                                                          |            |                                                                                                                                         |
|--------------|--------|------------------------------------------------------------------------------------------------------------------------------------------|------------|-----------------------------------------------------------------------------------------------------------------------------------------|
|              | MT3981 | <i>h<sup>-</sup> leu1-32 ura4-D18 stn1ts-1-3flag::LEU2</i>                                                                               | This study | See Materials and Methods.                                                                                                              |
|              | MT4624 | <i>h<sup>-</sup> leu1-32 ura4-D18 stn1-I177M-3flag::ura4<sup>+</sup></i>                                                                 | This study | JK317 was transformed with pMT852 ( <i>Ustn1-stn1-I177M-3flag-Tnmt1-ura4<sup>+</sup>-Dstn1</i> based on pMT8) DNA fragment.             |
|              | MT4625 | <i>h<sup>-</sup> leu1-32 ura4-D18 stn1-M180I-3flag::ura4<sup>+</sup></i>                                                                 | This study | JK317 was transformed with pMT853 ( <i>Ustn1-stn1-M180I-3flag-Tnmt1-ura4<sup>+</sup>-Dstn1</i> based on pMT8) DNA fragment.             |
|              | MT4626 | <i>h<sup>-</sup> leu1-32 ura4-D18 stn1-V249A-3flag::ura4<sup>+</sup></i>                                                                 | This study | JK317 was transformed with pMT854 ( <i>Ustn1-stn1-V249A-3flag-Tnmt1-ura4<sup>+</sup>-Dstn1</i> based on pMT8) DNA fragment.             |
|              | MT3983 | <i>h<sup>-</sup> leu1-32 ura4-D18 stn1-I177M M180I V249A-3flag::ura4<sup>+</sup></i>                                                     | This study | JK317 was transformed with pMT855 ( <i>Ustn1-stn1-I177M M180I V249A-3flag-Tnmt1-ura4<sup>+</sup>-Dstn1</i> based on pMT8) DNA fragment. |
|              | MT4627 | <i>h<sup>-</sup> leu1-32 ura4-D18 stn1-I177M V249A-3flag::ura4<sup>+</sup></i>                                                           | This study | JK317 was transformed with pMT856 ( <i>Ustn1-stn1-I177M V249A-3flag-Tnmt1-ura4<sup>+</sup>-Dstn1</i> based on pMT8) DNA fragment.       |
|              | MT3982 | Fig. 1B                                                                                                                                  |            |                                                                                                                                         |
|              | MT4628 | <i>h<sup>-</sup> leu1-32 ura4-D18 stn1-M180I V249A-3flag::ura4<sup>+</sup></i>                                                           | This study | JK317 was transformed with pMT857 ( <i>Ustn1-stn1-M180I V249A-3flag-Tnmt1-ura4<sup>+</sup>-Dstn1</i> based on pMT8) DNA fragment.       |
| Fig. S1B     | JK317  | Fig. 1B                                                                                                                                  |            |                                                                                                                                         |
|              | YT1738 | <i>h<sup>+</sup>/h<sup>-</sup> ade6-M210/ade6-M216 leu1-32/leu1-32 ura4-D18/ura4-D18</i>                                                 | Lab stock  |                                                                                                                                         |
|              | MT3982 | Fig. 1B                                                                                                                                  |            |                                                                                                                                         |
|              | MT4645 | <i>h<sup>+</sup>/h<sup>-</sup> ade6-M210/ade6-M216 leu1-32/leu1-32 ura4-D18/ura4-D18 stn1<sup>+</sup>/stn1-1-3flag::ura4<sup>+</sup></i> | This study | YT1738 was transformed with pMT843 ( <i>Ustn1-stn1-1-3flag-Tnmt1-ura4<sup>+</sup>-Dstn1</i> based on pUC119) DNA fragment.              |
| Fig. S2      | JK317  | Fig. 1B                                                                                                                                  |            |                                                                                                                                         |
|              | MT3972 | <i>h<sup>-</sup> leu1-32 ura4-D18 ten1-3ha::LEU2</i>                                                                                     | This study | JK317 was transformed with pMT859 ( <i>ten1-3ha-Tnmt1-LEU2-Dten1</i> based on pUC119) DNA fragment.                                     |
|              | MT3967 | Fig. 1C                                                                                                                                  |            |                                                                                                                                         |
|              | MT3982 | Fig. 1B                                                                                                                                  |            |                                                                                                                                         |
|              | MT3977 | <i>h<sup>-</sup> leu1-32 ura4-D18 stn1-3flag::LEU2 ten1-3ha::ura4<sup>+</sup></i>                                                        | This study | MT3967 was transformed with pMT858 ( <i>ten1-3ha-Tnmt1-ura4<sup>+</sup>-Dten1</i> based on pUC119) DNA fragment.                        |
|              | MT4528 | <i>h<sup>90</sup> or h<sup>-</sup> leu1-32 ura4-D18 stn1-1-3flag::ura4<sup>+</sup> ten1-3ha::LEU2</i>                                    | This study | MT3972 was mated with MT4535. Isolation by random spore.                                                                                |
| Fig. S3B     | JK317  | Fig. 1B                                                                                                                                  |            |                                                                                                                                         |
|              | MT3982 | Fig. 1B                                                                                                                                  |            |                                                                                                                                         |
| Fig. S3C     | JK317  | Fig. 1B                                                                                                                                  |            |                                                                                                                                         |
| lanes 2, 5-8 | MT3982 | Fig. 1B                                                                                                                                  |            |                                                                                                                                         |
|              | MT4531 | <i>h<sup>+</sup> or h<sup>-</sup> ade6-M210 or ade6-M216 leu1-32 ura4-D18 stn1::kanMX6</i>                                               | This study | <i>stn1</i> was disrupted in YT1738. Isolation by tetrad dissection.                                                                    |
| lane 9, 10   | MT4510 | Fig. 4A                                                                                                                                  |            |                                                                                                                                         |
| Fig. S4A     | JK317  | Fig. 1B                                                                                                                                  |            |                                                                                                                                         |
|              | MT3982 | Fig. 1B                                                                                                                                  |            |                                                                                                                                         |
|              | MT4532 | <i>h<sup>-</sup> leu1-32 ura4-D18 stn1-1-3flag::ura4<sup>+</sup> exo1::kanMX6</i>                                                        | This study | <i>exo1</i> was disrupted in MT3982.                                                                                                    |
|              | MT4534 | <i>h<sup>-</sup> leu1-32 ura4-D18 stn1-1-3flag::ura4<sup>+</sup> mre11::kanMX6</i>                                                       | This study | <i>mre11</i> was disrupted in MT3982.                                                                                                   |
| Fig. S4B     | MT4532 | Fig. S4A                                                                                                                                 |            |                                                                                                                                         |
|              | MT4650 | <i>h<sup>90</sup> or h<sup>-</sup> leu1-32 ura4-D18 stn1-1-3flag::LEU2 rqh1::kanMX6</i>                                                  | This study | MT4512 was mated with TM1159. Isolation by random spore.                                                                                |
|              | MT4652 | <i>h<sup>90</sup> or h<sup>-</sup> leu1-32 ura4-D18 stn1-1-3flag::LEU2 rqh1::kanMX6 exo1::hphMX6</i>                                     | This study | <i>exo1</i> was disrupted in MT4650.                                                                                                    |
| Fig. S5      | MT4660 | <i>h<sup>90</sup> or h<sup>-</sup> leu1-32 ura4-D18 stn1-1-3flag::LEU2 rad16::ura4<sup>+</sup></i>                                       | This study | MT4512 was mated with TN144. Isolation by random spore.                                                                                 |
| Fig. S6A     | JK317  | Fig. 1B                                                                                                                                  |            |                                                                                                                                         |
|              | MT3982 | Fig. 1B                                                                                                                                  |            |                                                                                                                                         |
| Fig. S6B     | JK317  | Fig. 1B                                                                                                                                  |            |                                                                                                                                         |
|              | MT3982 | Fig. 1B                                                                                                                                  |            |                                                                                                                                         |
| Fig. S6C     | MT4520 | Fig. 6A                                                                                                                                  |            |                                                                                                                                         |
|              | MT4522 | Fig. 6A                                                                                                                                  |            |                                                                                                                                         |
| Fig. S7A     | MT4530 | Fig. 5C                                                                                                                                  |            |                                                                                                                                         |
|              | MT4704 | Fig. 5C                                                                                                                                  |            |                                                                                                                                         |
| Fig. S7B     | MT4530 | Fig. 5C                                                                                                                                  |            |                                                                                                                                         |
|              | MT4704 | Fig. 5C                                                                                                                                  |            |                                                                                                                                         |
| Fig. S8      | JK317  | Fig. 1B                                                                                                                                  |            |                                                                                                                                         |
| lanes 2, 4-6 | MT4522 | Fig. 6A                                                                                                                                  |            |                                                                                                                                         |
|              | MT3982 | Fig. 1B                                                                                                                                  |            |                                                                                                                                         |
| Fig. S10A    | TM2241 | <i>h<sup>-</sup> leu1-32 ura4-D18 pol1-12myc::ura4<sup>+</sup></i>                                                                       | Lab stock  | JK317 was transformed with pMP187 ( <i>pol1-12myc-Tnmt1-ura4<sup>+</sup></i> based on pJK202) DNA fragment.                             |
|              | MT4664 | <i>h<sup>90</sup> or h<sup>-</sup> leu1-32 ura4-D18 stn1-1-3flag::LEU2 pol1-12myc::ura4<sup>+</sup></i>                                  | This study | MT4512 was mated with TM2241. Isolation by random spore.                                                                                |
| Fig. S10B    | MT4666 | <i>h<sup>-</sup> leu1-32 ura4-D18 pol2-12myc::ura4<sup>+</sup></i>                                                                       | This study | JK317 was transformed with pMT860 ( <i>pol2-12myc-Tnmt1-ura4<sup>+</sup></i> based on pJK202) DNA fragment.                             |
|              | MT4668 | <i>h<sup>-</sup> leu1-32 ura4-D18 stn1-1-3flag::LEU2 pol2-12myc::ura4<sup>+</sup></i>                                                    | This study | MT4510 was transformed with pMT860 ( <i>pol2-12myc-Tnmt1-ura4<sup>+</sup></i> based on pJK202) DNA fragment.                            |
| Fig. S10C    | MT4670 | <i>h<sup>-</sup> leu1-32 ura4-D18 pol3-12myc::ura4<sup>+</sup></i>                                                                       | This study | JK317 was transformed with pMT861 ( <i>pol3-12myc-Tnmt1-ura4<sup>+</sup></i> based on pJK202) DNA fragment.                             |
|              | MT4672 | <i>h<sup>-</sup> leu1-32 ura4-D18 stn1-1-3flag::LEU2 pol3-12myc::ura4<sup>+</sup></i>                                                    | This study | MT4510 was transformed with pMT861 ( <i>pol3-12myc-Tnmt1-ura4<sup>+</sup></i> based on pJK202) DNA fragment.                            |
| Table S1     | MT4461 | <i>h<sup>-</sup> leu1-32 ura4-D18 sds21::hphMX6</i>                                                                                      | This study | <i>sds21</i> was disrupted in JK317.                                                                                                    |
|              | MT4463 | <i>h<sup>-</sup> leu1-32 ura4-D18 dis2::kanMX6</i>                                                                                       | This study | <i>dis2</i> was disrupted in JK317.                                                                                                     |
|              | MT4512 | <i>h<sup>90</sup> leu1-32 ura4-D18 stn1-1-3flag::LEU2</i>                                                                                | This study | JK800 was transformed with pMT845 ( <i>Ustn1-stn1-1-3flag-Tnmt1-LEU2-Dstn1</i> based on pUC119) DNA fragment.                           |
|              | MT4535 | <i>h<sup>90</sup> leu1-32 ura4-D18 stn1-1-3flag::ura4<sup>+</sup></i>                                                                    | This study | JK800 was transformed with pMT843 ( <i>Ustn1-stn1-1-3flag-Tnmt1-ura4<sup>+</sup>-Dstn1</i> based on pUC119) DNA fragment.               |

**Fig. S1**

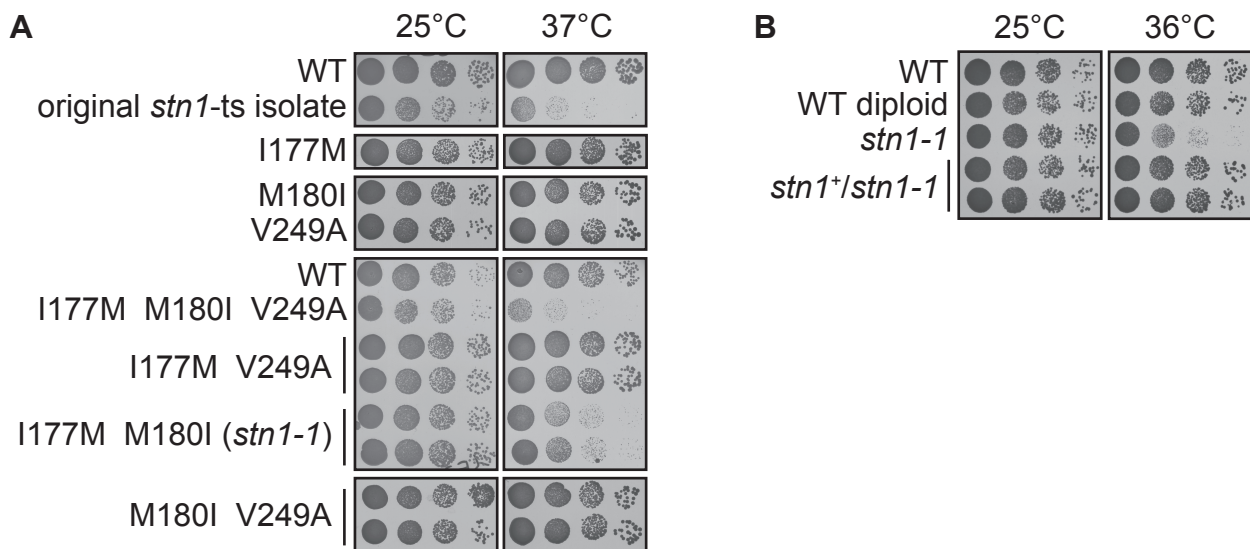

Figure S1.

(A) Ten-fold serial dilutions were spotted onto YES plates and incubated at 25°C or 37°C for 3 days. (B) WT (haploid), WT diploid, *stn1*-1 (haploid), and *stn1*<sup>+</sup>/*stn1*-1 cells were spotted onto YES plates and incubated at 25°C for 3 days and at 36°C for 2 days.

**Fig. S2**

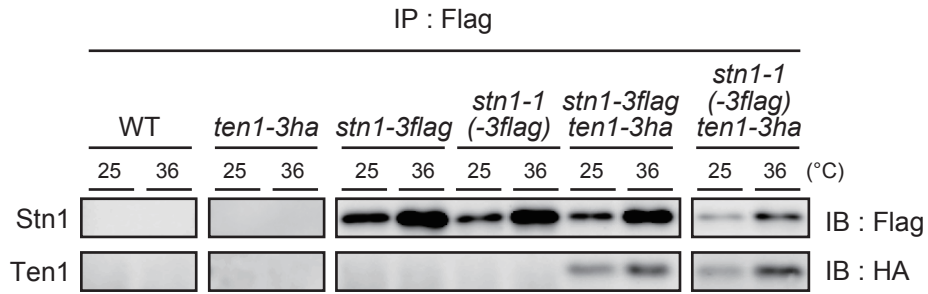

Figure S2.

Flag- or HA-tagged Stn1 or Ten1 expressing strains were used in immunoprecipitation-immunoblotting experiments. Each strain was cultivated at 25°C or 36°C for 16 hr. All the samples were immunoprecipitated with anti-Flag antibodies and immunoblotted with anti-Flag and anti-HA antibodies.

**Fig. S3**

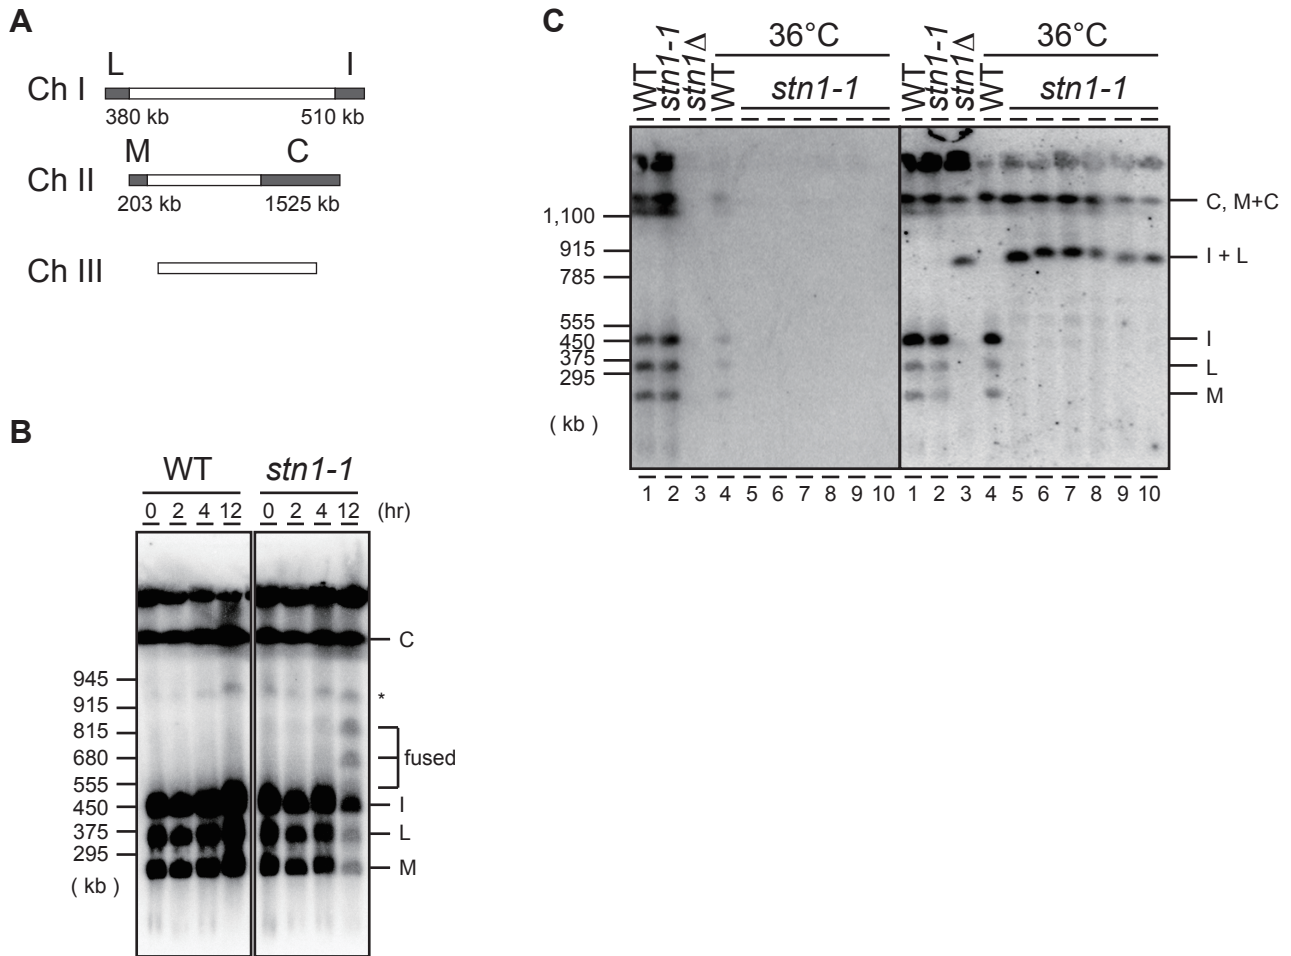

Figure S3.

(A) A model of *S. pombe* chromosomes and the telomere-proximal Not I sites.

(B) Wild type and *stn1-1* were cultured at 36°C for the indicated times.

Pulsed-field gel electrophoresis was conducted and the membrane was hybridized with I, L, M, and C probes. Non-specific signals are indicated by asterisk.

(C) Wild type (25°C), *stn1-1* (25°C), and *stn1Δ* (32°C) were harvested in YES liquid media (lanes 1-3). Before harvesting in YES liquid media at 36°C, wild type and *stn1-1* were sequentially streaked 4 times on YES plates at 36°C. *stn1-1* were picked up from 6 independent colonies (lanes 5-10). Pulsed-field gel electrophoresis was conducted and hybridized with a telomeric probe (left) and I, L, M, and C probes (right).



**Fig. S4**

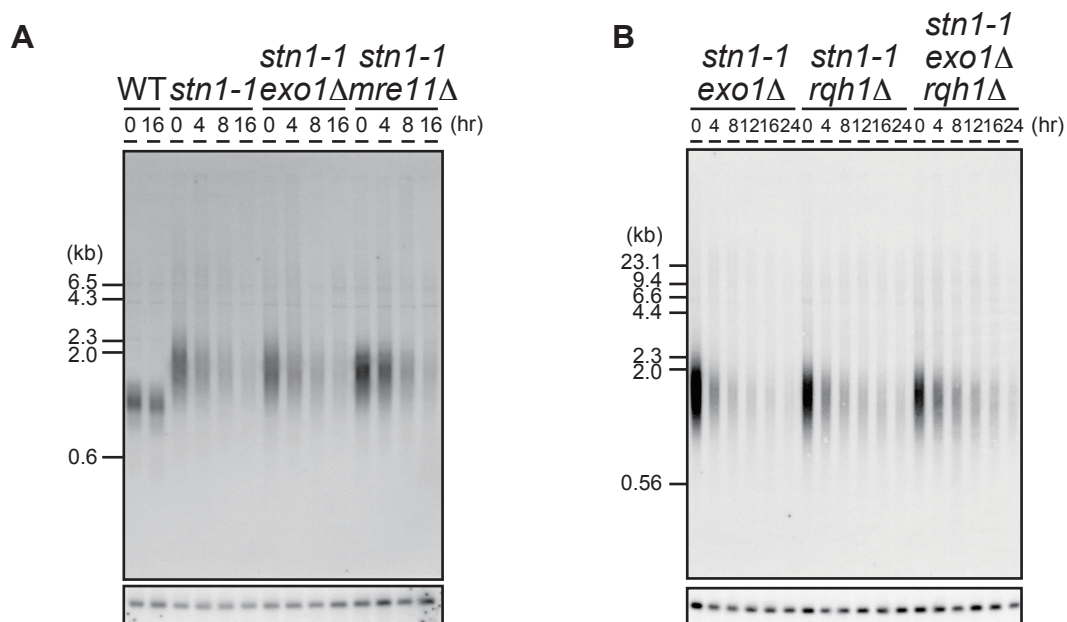

Figure S4.

(A) Wild type, *stn1-1*, *stn1-1 exo1Δ*, and *stn1-1 mre11Δ*, and (B) *stn1-1 exo1Δ*, *stn1-1 rqh1Δ*, and *stn1-1 exo1Δ rqh1Δ* were cultured at 25°C and shifted to 36°C for the indicated times. Southern hybridizations were carried out as for Figure 1E. The membrane was hybridized with the telomeric probe (upper) and re-hybridized with the control region probe (bottom).

**Fig. S5**

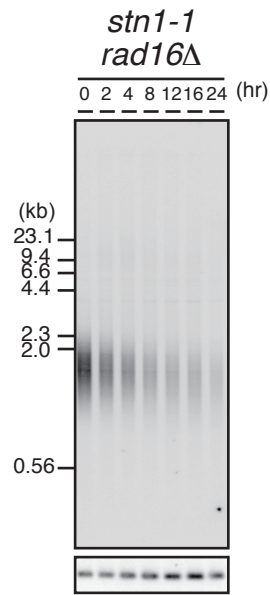

Figure S5.

*stn1-1 rad16Δ* was cultured at 25 °C and shifted to 36°C for the indicated times. Southern hybridizations were carried out as for Figure 1E. The membrane was hybridized with the telomeric probe (upper) and re-hybridized with the control region probe (bottom).

**Fig. S6**

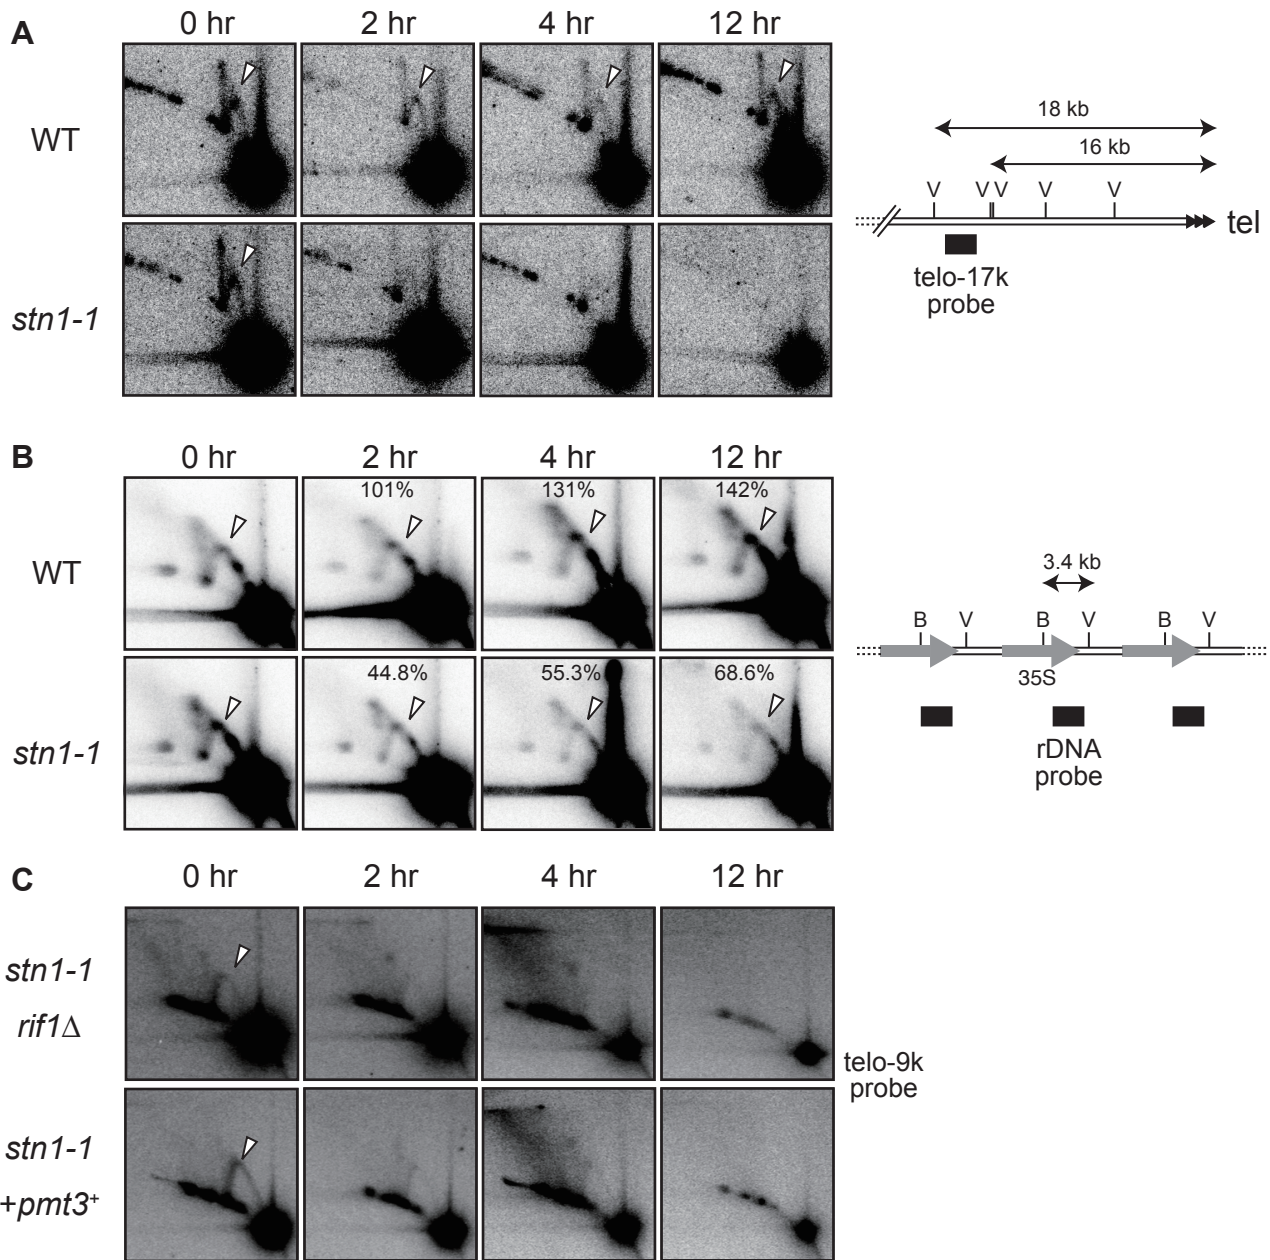

Figure S6.

(A, B) Wild type and *stn1-1* were cultured at 36°C for the indicated times. (A) EcoRV-digested DNA and (B) EcoRV- and Bgl II-digested DNA was resolved with neutral-neutral 2D gel electrophoresis, and hybridization was conducted with (A) telo-17k and (B) rDNA probe, respectively. Replication intermediate signals were quantitated and the changes from 0 hr were described. (C) *stn1-1 rif1Δ* and *stn1-1 pmt3* overexpressing strains were cultivated at 36°C for the indicated times.

Fig. S7

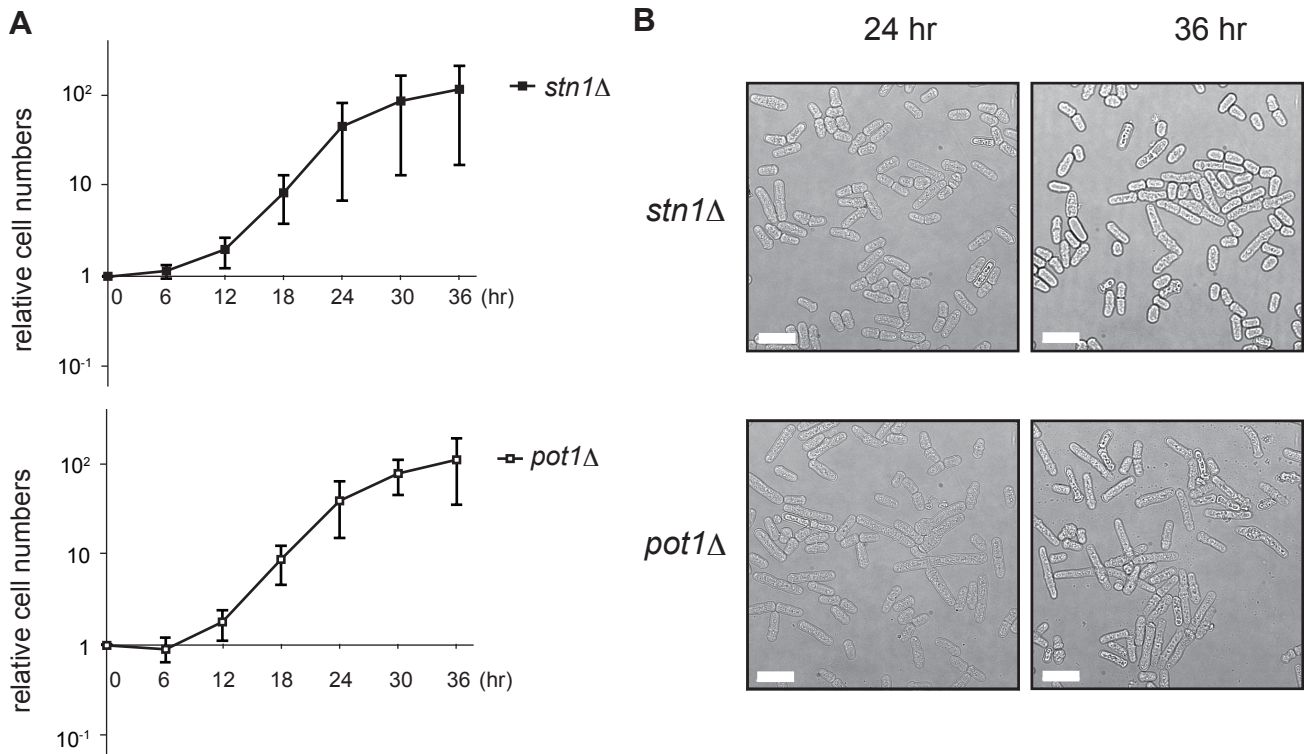

Figure S7.

(A) *stn1*<sup>+</sup> / *stn1*Δ and *pot1*<sup>+</sup> / *pot1*Δ diploid cells were germinated and the relative cell numbers were counted. Germinated *stn1*Δ and *pot1*Δ were cultured up to 36 hours. Error bars represent mean values of three independent experiments with SD. (B) Representative micrographs of germinated *stn1*Δ and *pot1*Δ cells. The scale bar represents 15 μm.

**Fig. S8**

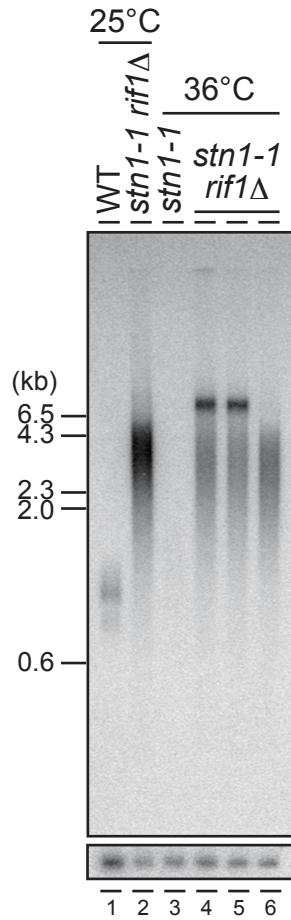

Figure S8.

Wild type and *stn1-1 rif1Δ* were cultured and harvested at 25°C (lanes 1 and 2). Before harvesting in YES liquid media at 36°C, *stn1-1* and *stn1-1 rif1Δ* were sequentially streaked 6 times (over a period of 18 days) on YES plates at 36°C. *stn1-1 rif1Δ* were picked up from 3 independent colonies (lanes 4-6). Southern hybridizations were carried out as for Figure 1E.

Fig. S9

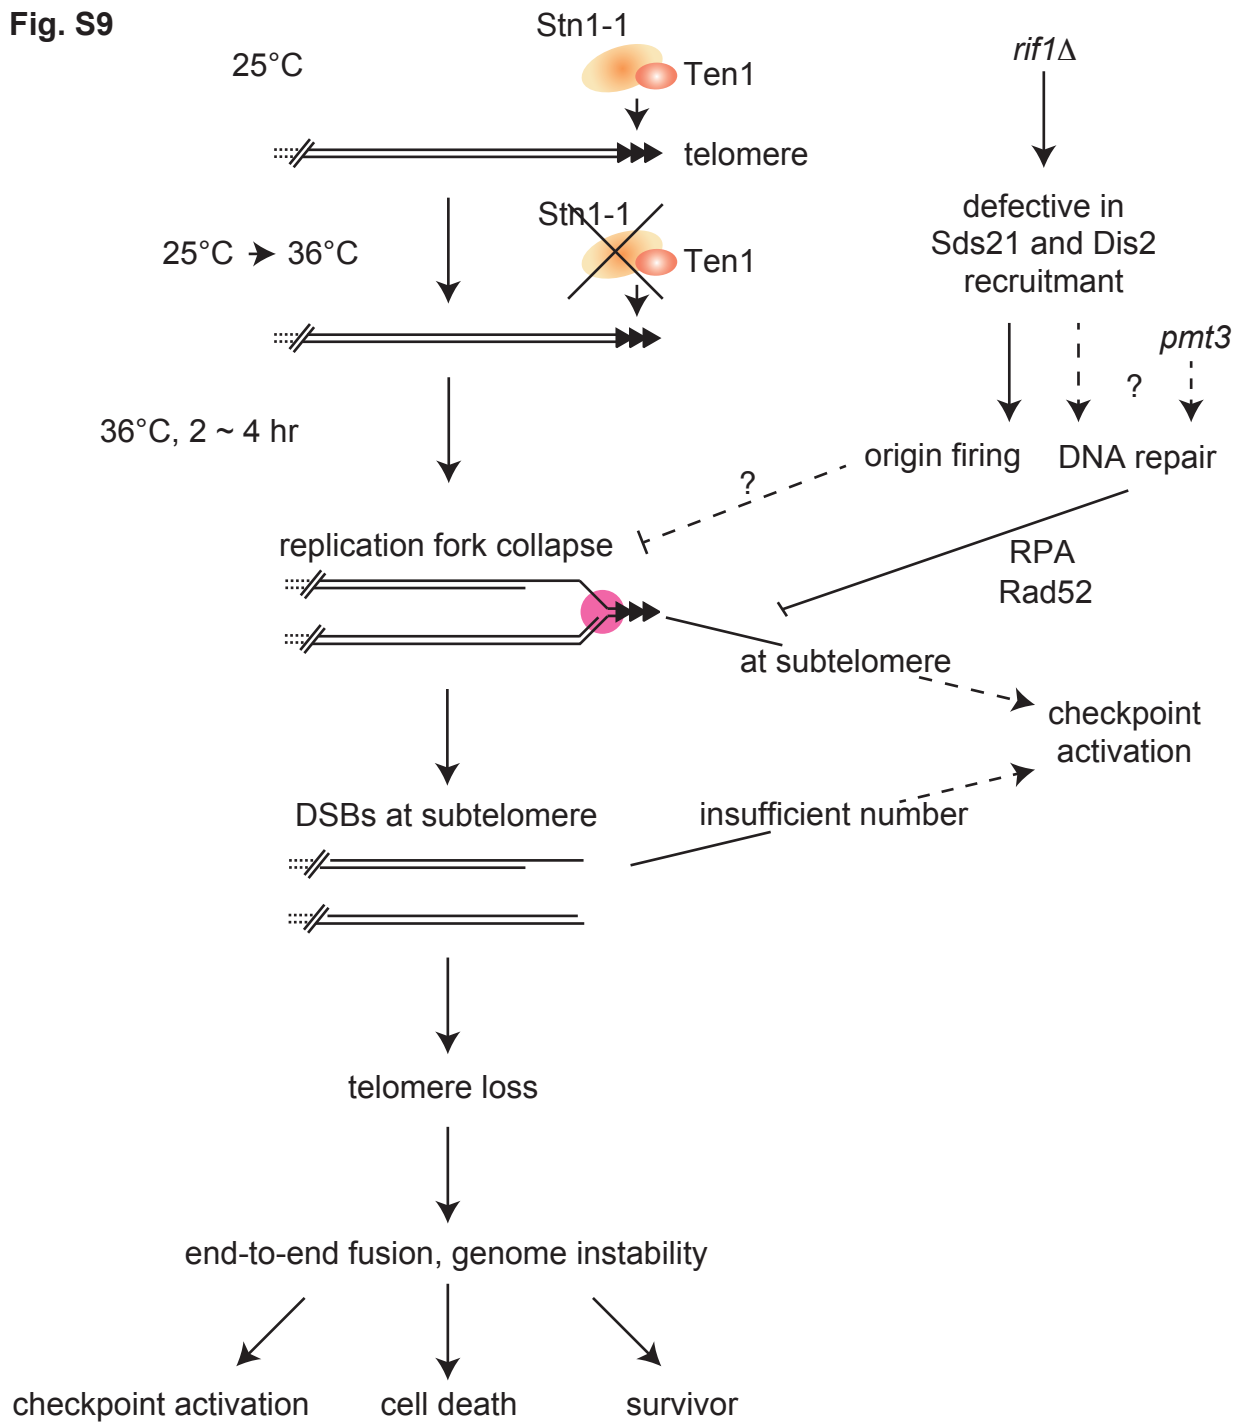

Figure S9.

Schematic model based on this study. Immediately after the temperature is shifted to the restrictive temperature, Stn1-1 loses function, and replication forks frequently collapse at subtelomeres. Fork collapse results in DSB formation and telomere loss. Severe DNA damage at telomeres and subtelomeres is spontaneously suppressed via Pot1 accumulation.

Fig. S10

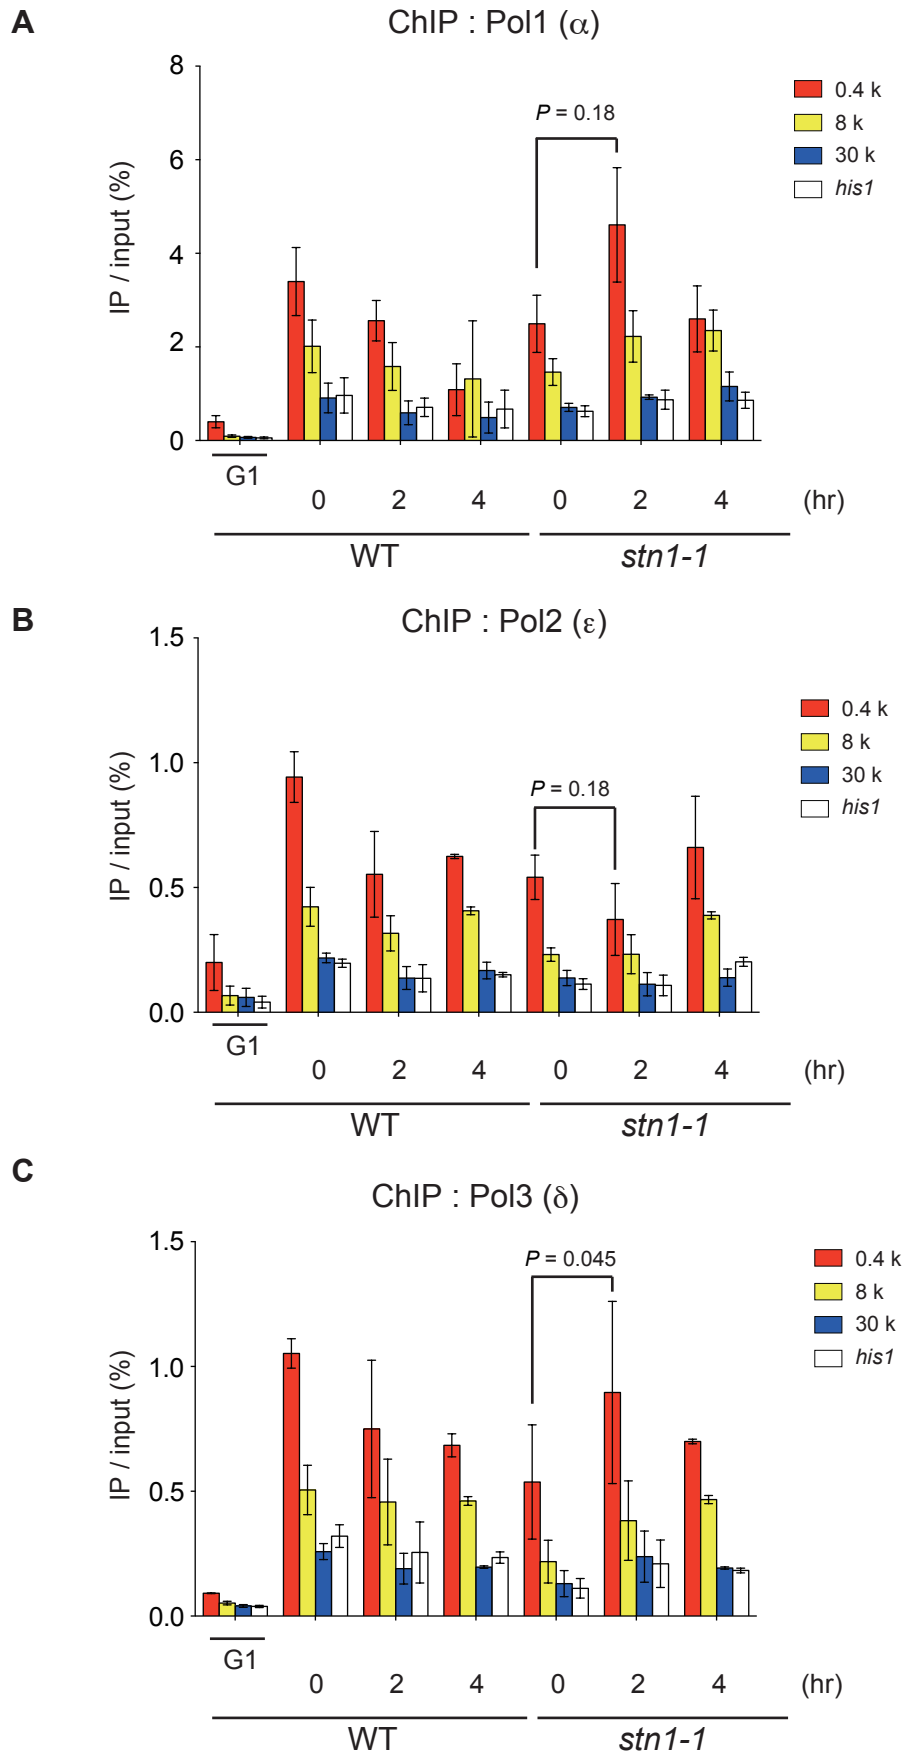

Figure S10.

(A, B, C) C-terminally myc-tagged (A) Pol1 ( $\alpha$ ), (B) Pol2 ( $\epsilon$ ), and (C) Pol3 ( $\delta$ ) expressing wild type and *stn1-1* were cultured at the indicated times and analyzed by ChIP-qPCR. Error bars show mean values of three independent experiments with SD. Each *P* value was calculated with a two-tailed Student' s t-test.
